# Supplementary material for: Shape-Programmable Liquid Metal Fibers
Source: MDPI journal article supplement (doi:10.3390/bios13010028), 2022-12-26
Supplement: s1 [file s1]

*Supporting Information*

# Shape-Programmable Liquid Metal Fibers

Biao Ma<sup>†</sup>, Jin Zhang<sup>†</sup>, Gangsheng Chen, Yi Chen, Chengtao Xu and Hong Liu<sup>\*</sup>

State Key Laboratory of Bioelectronics, School of Biological Science and Medical Engineering, Southeast University, Nanjing 210096, China

\* Correspondence: liuh@seu.edu.cn

† These authors contributed equally to this work.

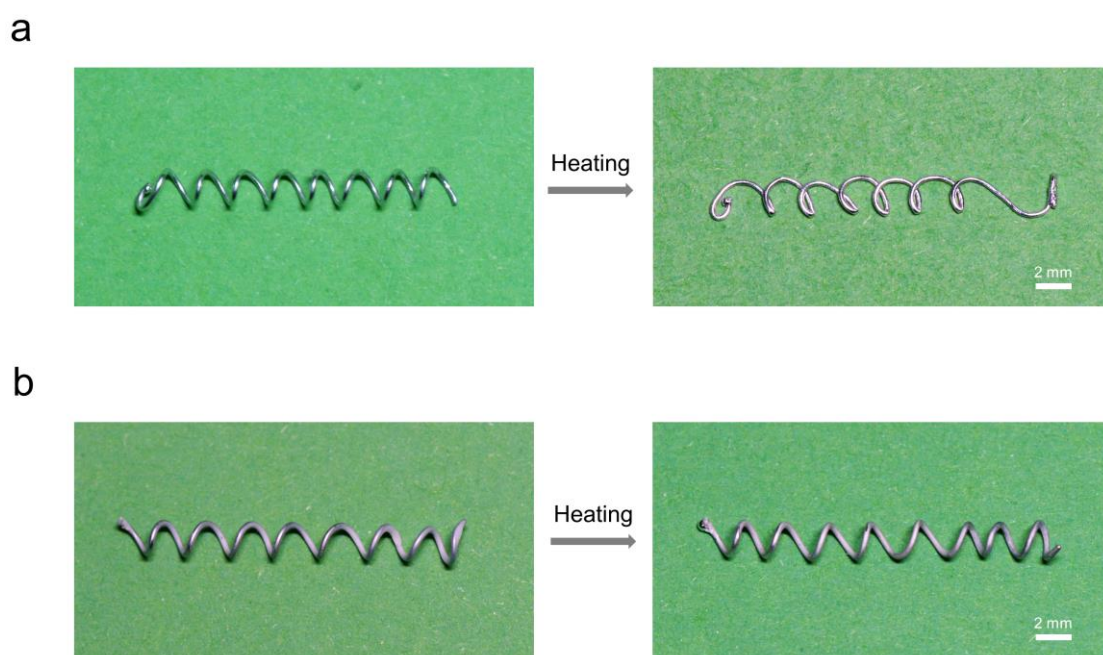

**Figure S1.** Comparations of the helical gallium fiber without (a) and with (b) PU shell after heating. The helical structure can be maintained with the support of a PU shell when the gallium was in the liquid state.

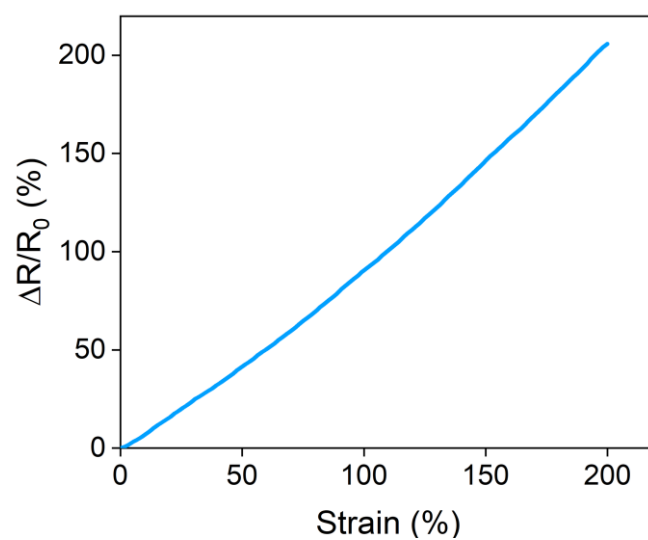

**Figure S2.** Relative resistance change of the ultrafine LM fiber as a function of the tensile strain.

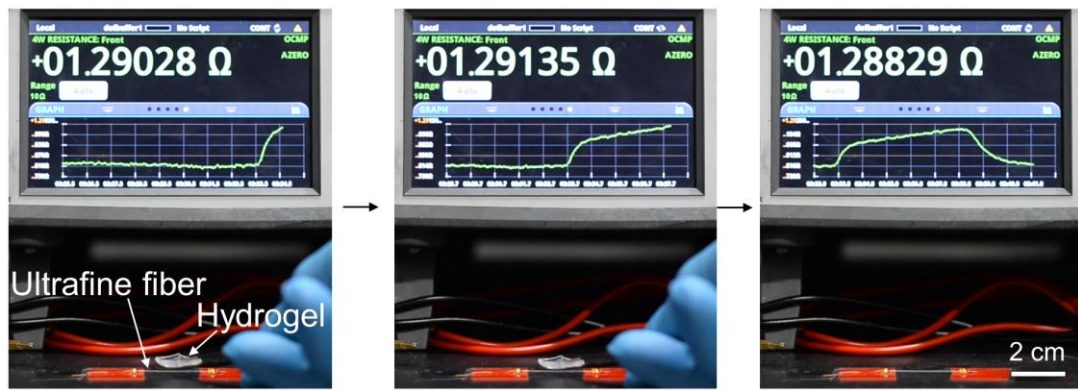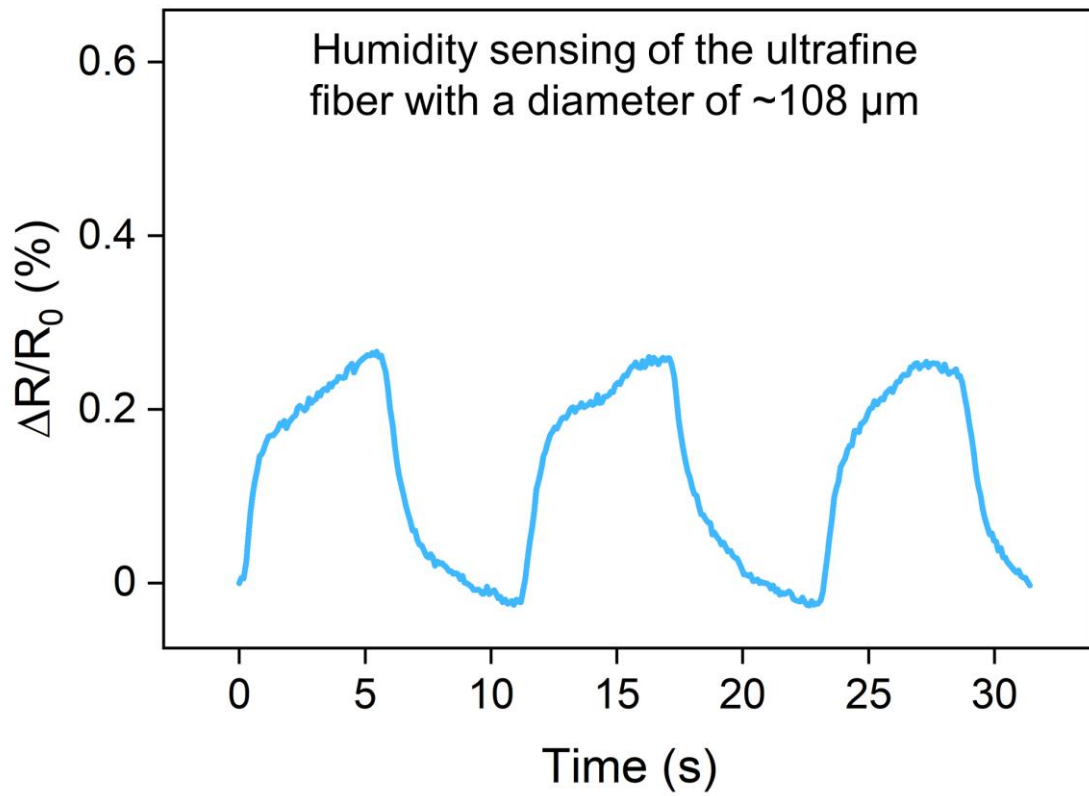

**Figure S3.** Humidity sensing of the ultrafine fiber. The resistance of ultrafine fiber increased rapidly when a piece of hydrogel approached.

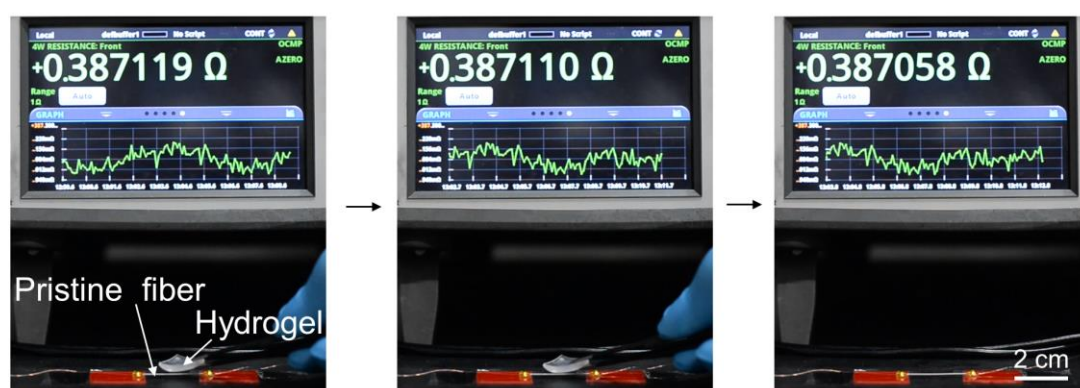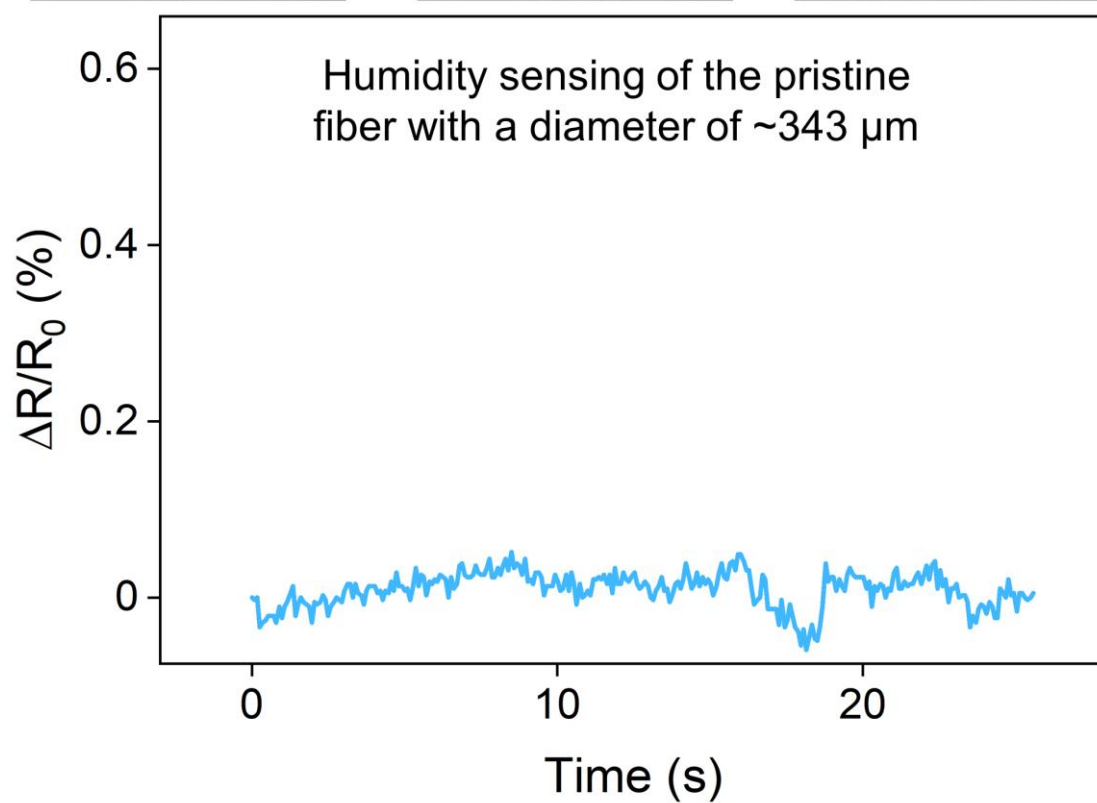

**Figure S4.** The pristine LM fiber with a diameter of  $\sim 343 \mu\text{m}$  showed no response to the humidity change of the environment.
